# Supplementary material for: Methane emissions due to reservoir flushing: a significant emission pathway?
Source: Copernicus journal article supplement (doi:10.5194/bg-20-4057-2023), 2023-10-04
Supplement: Supplementary file 1 [file bg-20-4057-2023-supplement.pdf]

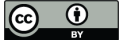

*Supplement of*

## **Methane emissions due to reservoir flushing: a significant emission pathway?**

**Ole Lessmann et al.**

*Correspondence to:* Ole Lessmann (ole.lessmann@uni-konstanz.de) and Frank Peeters (frank.peeters@uni-konstanz.de)

The copyright of individual parts of the supplement might differ from the article licence.

# 1 Supplementary Figures

## 2 Supplementary Figure S1

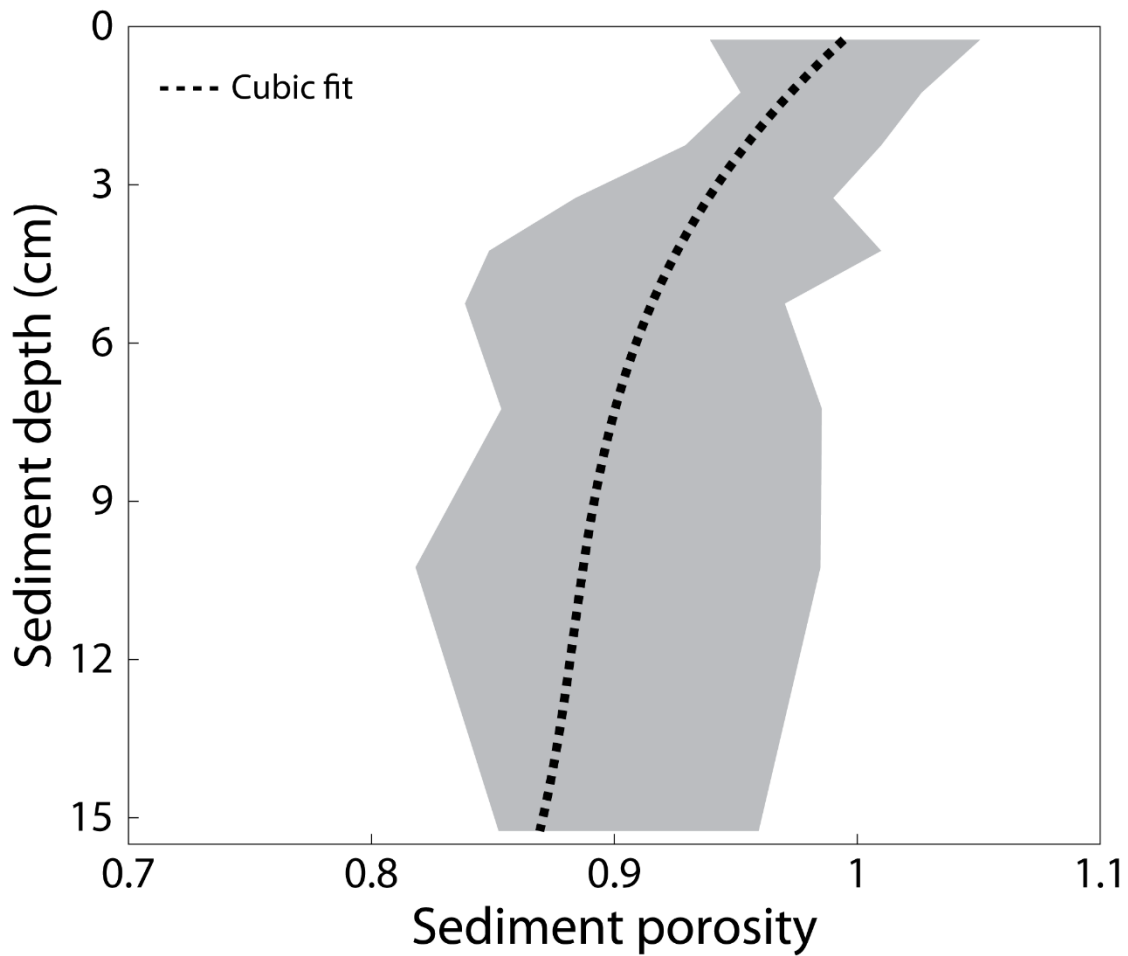

Supplementary Figure S1. Cubic fit of sediment porosity versus sediment depth (dotted line) of all porosity data from sediment profiles across all sampling campaigns. Shaded areas display the 25<sup>th</sup> and 75<sup>th</sup> percentile.

12 Supplementary Figure S2

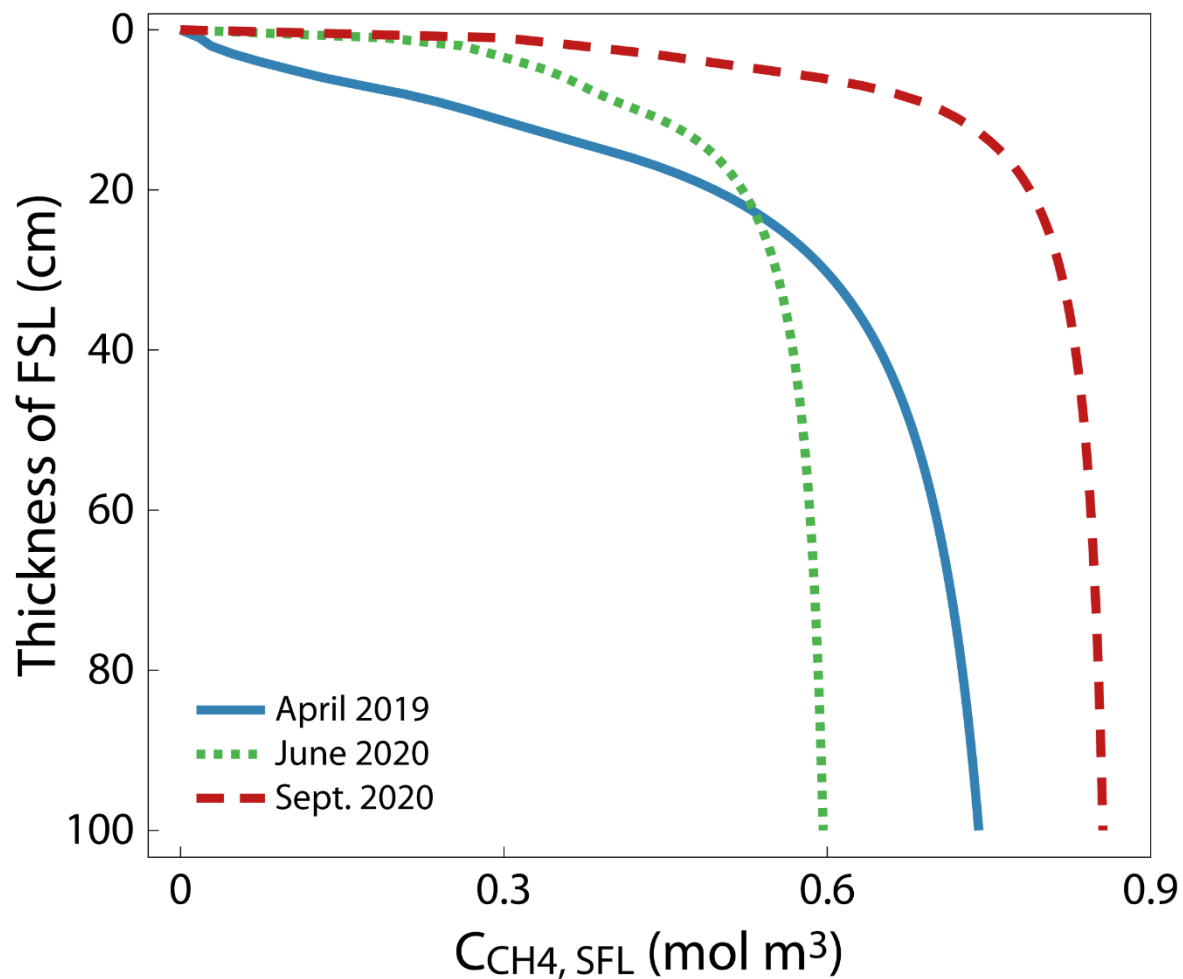

13  
14 Supplementary Figure S2. The average CH<sub>4</sub> concentration in the flushed sediment layer  
15 for a sediment depth down to 100 cm.
